# Supplementary material for: Increased demand for amphetamine treatment in rural Australia
Source: Springer Nature journal article supplement (doi:10.1186/s13722-019-0144-6), 2019-04-01
Supplement: MOESM1 [file 16587598]

Additional File 1: Variable Grouping

| Variable                 | Original categories in AODTS-NMDS                                                                                                                                                                                       | Combined to                             |
|--------------------------|-------------------------------------------------------------------------------------------------------------------------------------------------------------------------------------------------------------------------|-----------------------------------------|
| Sex                      | Male                                                                                                                                                                                                                    | Male                                    |
|                          | Female                                                                                                                                                                                                                  | Female                                  |
|                          | Not stated                                                                                                                                                                                                              | Removed                                 |
| Indigenous status        | Aboriginal but not Torres Strait Islander origin, Torres Strait Islander but not Aboriginal origin, Aboriginal and Torres Strait Islander origin                                                                        | Indigenous (Yes)                        |
|                          | Neither Aboriginal nor Torres Strait Islander origin, Not stated                                                                                                                                                        | Non- Indigenous (No)                    |
| Living arrangement       | Alone                                                                                                                                                                                                                   | Alone                                   |
|                          | Parent(s), Other relative(s), Friend(s), Friend(s)/parent(s)/relative(s)                                                                                                                                                | With parents or friends or relatives    |
|                          | Spouse/partner, Alone with child(ren), Spouse/partner and child(ren)                                                                                                                                                    | With spouse/ partner and/ or child(ren) |
|                          | Other, Not known/not stated                                                                                                                                                                                             | Unknown/ Others                         |
| Usual accommodation type | Rented house or flat (public or private), Privately owned house or flat                                                                                                                                                 | Owned or rented                         |
|                          | Boarding house, Hostel/supported accommodation services, Psychiatric hospital, Alcohol/other drug treatment residence, Shelter/refuge, Prison/detention centre, Caravan on a serviced site, No usual residence/homeless | Temporary accommodation or homeless     |
|                          | Other, Not known                                                                                                                                                                                                        | Unknown/ Others                         |
| Referral source          | Self                                                                                                                                                                                                                    | Self                                    |
|                          | Police diversion, Court diversion, Other criminal justice setting, Family and child protection service                                                                                                                  | Legal setting                           |
|                          | General practitioner, Medical officer/specialist, Psychiatric hospital, Other hospital, Residential community mental health care unit, Other residential community care unit, Non-                                      | Health care setting                     |

|                     |                                                                                                                    |                        |
|---------------------|--------------------------------------------------------------------------------------------------------------------|------------------------|
|                     | residential community mental health centre,<br>Non-residential community health centre                             |                        |
|                     | Residential alcohol and other drug treatment<br>agency, Non-residential alcohol and other drug<br>treatment agency | Other AOD              |
|                     | Family member/friend, Workplace, Other, Not<br>stated                                                              | Others                 |
| Source of<br>income | Temporary benefit, Pension, Student<br>allowance, Dependent on others, Retirement<br>fund                          | Not through employment |
|                     | Full-time employment, Part-time employment                                                                         | Through employment     |
|                     | No income                                                                                                          | No income              |
|                     | Other, Not stated/not known                                                                                        | Unknown                |
